# Supplementary material
Source: Springer Nature journal article supplement (https://www.springermedizin.de/resource/supplementary/12879_2012_3034_MOESM5_ESM.pdf/9446510)

# Boxplot of ACTUALcost; NOMINALcost

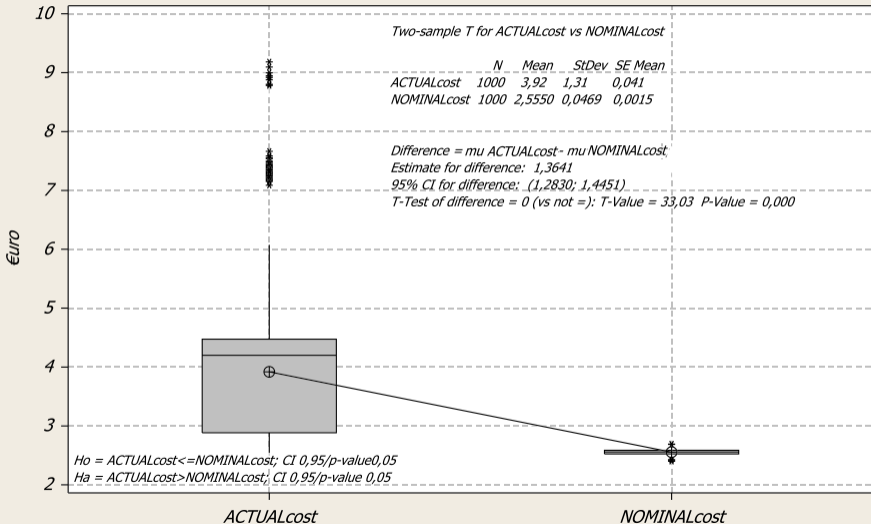

Supplement: MOESM5 [file 9446510]
